# Supplementary material for: Large increases in N cn and N ccn together with a nucleation-modeparticle pool over the northwestern Pacific Ocean in the spring of 2014
Source: Copernicus journal article supplement (doi:10.5194/acp-2018-1089), 2019-01-02
Supplement: Supplementary file [file acp-2018-1089-AC2-supplement.pdf]

## *Anonymous Referee #2*

### **General comments:**

*This paper presents potentially interesting information on particle number size distributions and concentrations as well as CCN concentrations in a marine boundary layer. However, before recommending the acceptance of this paper for publications, several issues need to be discussed in more detail and care. My main points in this regard are given below.*

**Response:** Thanks for reviewer's comments. We try our best to revise the manuscript accordingly.

*Section 1. The authors need to define the scientific aims of this study more clearly in the paper. It is not enough to say what is being studied in the paper. The sentence "Several new findings have. . ." on page 3 sounds strange here.*

**Response:** Agree and revise accordingly. In the revision, page 2, lines 14-19, we add "Due to practical difficulties, direct observations of  $N_{\text{ccn}}$  in the remote marine atmosphere are still limited and this restrains to gain reliable estimates of the  $N_{\text{ccn}}$  over the oceans, leading to the results of aerosol-cloud interaction estimates suffering from a larger error (Rosenfeld et al., 2019; Sato and Suzuki, 2019).", Page 2, Lines 29-31, we add "Moreover, modeling studies show that the NWPO likely suffer from the largest increase in surface sea temperature and experience the largest increase in  $\text{CO}_2$  sink under warming climate (John et al., 2015; Lauvset et al., 2017). This further demonstrates the importance to study  $N_{\text{cn}}$  and  $N_{\text{CCN}}$  and related potential climate effects therein." Page 3, Lines 3-5, we add "Through a comprehensive comparison with those observations in literature, we illustrated the characteristic of  $N_{\text{cn}}$  and  $N_{\text{ccn}}$  over the NWPO in 2014 and revealed the changes in  $N_{\text{cn}}$  and  $N_{\text{ccn}}$  against the results measured two decades ago. In addition, the influences of dust and BB aerosols on  $N_{\text{cn}}$  and  $N_{\text{ccn}}$  were also analyzed on the monthly time scale."

*Section 2.1. Description of the methods is incomplete. Nothing is said about the detection limits of gas-phase instruments, or the performance of any of the instruments during the campaign. Was it tested whether the instruments (e.g. CCNC) performed during the measurements? The authors mention a correction factor of 1.25 for the FMPS but do not explain where this factor comes from. What are the potential effects of uncertainties in FMPS measurements on the results discussed in this paper? (something is mentioned on page 6, lines 23-26, but probably more is needed).*

**Response:** We revise the method parts accordingly. The detection limits of gas monitors have been added in the revision. Based on our recent measurements made by an on-line ion chromatography in remote marine atmospheres, we reluctantly used the data measured by the gas monitors to characterize the background concentrations of gaseous pollutants therein. We only used the data to help screen out ship self-emission. This has been clarified in the revision. It is almost impossible to test the performance of instruments during the cruise, but the instruments were tested after the campaign.

According to side-by-side measurements between the FMPS and a CPC during several campaigns before and after, the empirical coefficient of 1.25 was obtained. A comparison result has been added in supporting information (Fig. S2). The particle size reported by FMPS suffers from the errors against the results measured by the scanning mobility particle sizer (SMPS) (Lee et al., 2013), but the errors can be reasonably corrected using the empirical correction procedure proposed by Zimmenrman et al. (2015) to obtain highly consistent results with SMPS. We thereby conducted the correction in this study. This has been added in the revision.

*Section 3.1, last paragraph. There is a larger number of papers reporting CCN concentrations in the scientific literature. What was the basis for selecting these few studies when comparing results from this study? And why a single study conducted in Arctic was chosen here?*

**Response:** Agree. We add a long discussion on the comparison among those measurements in various marine atmospheres in the revision. Please see our revised Section 3.1.

*Section 3.3. After the more than 20-year-old papers cited here, a large number of studies (even reviews) on marine number size distributions have been published. The authors should make better use of these, more recent studies.*

**Response:** Agree. In the revision, we add “As reviewed by Vu et al. (2015), the particle number size distributions in the marine atmospheric boundary layer usually showed two modes, such as Aitken mode and accumulation mode, with nucleation mode to be observed occasionally (Koponen et al., 2002; Ueda et al., 2016; Zhu et al., 2019). For example, the particle size number concentrations exhibited a bimodal distribution with an Aitken mode (~ 50 nm) and an accumulation mode (150-180 nm) during the fall campaign over the western North Pacific in 2008 (Mochida et al., 2011). The bimodal distributions were also reported during a winter campaign over the tropical and subtropical Pacific Oceans from 2011 to 2012 (Ueda et al., 2016) and during a campaign over the western North Atlantic in June-July 2013 (Kristensen et al., 2016). However, the Aitken mode and the accumulation mode were sometimes overlapped in the particle number size spectra measured over marginal seas influenced by polluted air masses (Lin et al., 2007; Nair et al., 2013; Zhu et al., 2019).”

*Section 3.4. Again, there are a number of more recent airborne studies on new particle formation in and above MFL in the scientific literature.*

**Response:** In the revision, Page 9, bottom paragraph, we add “Recent measurements further supported that NPF events most likely occurred in the free troposphere over different oceanic zones (Dadashazar et al., 2018; Rose et al., 2015; Sanchez et al., 2018; Takegawa et al., 2014). Several factors such as the lower temperatures and lower relative humidity, lower condensation sinks, mixed precursors from the continent and marine sources lower in free troposphere have also been argued why new particle formation occurred therein.”

In the revised last paragraph of Section 3.4, we add “Including the increase in  $N_{\text{cn}}$  by NPF events, a few studies proposed that the nucleation mode particles may grow to be larger, even reach CCN size in the free troposphere (Rose et al., 2015; Sanchez et al., 2018) and have size growth during subsidence process from free troposphere to MBL. Sanchez et al. (2018) estimated that the contributions of NPF in the free troposphere to the  $N_{\text{ccn}}$  at SS of 0.1% in the clean marine atmosphere over the North Atlantic were 31% and 33% in late-autumn and late-spring, respectively. Merikanto et al. (2009) reported that 55% of CCN at SS of 0.2% in the marine boundary layer were from nucleation, with 45% entrained from the free troposphere and reminding 10% nucleated directly in the boundary layer. However, the growth of newly formed particles to CCN size was not observed in this study.”

*Section 3.5. What is the purpose of the two sentences on lines 27-29 in this section? Also the discussion at the end of this section is a bit confusing.*

**Response:** In revision, we add “Regarding of the vertical distribution of the  $N_{\text{ccn}}$  over the marine atmosphere, three scenario are hypothesized: 1) the  $N_{\text{ccn}}$  aloft was larger than those in the atmosphere near the sea level; 2) the  $N_{\text{ccn}}$  in vertical direction was homogenous; 3) the  $N_{\text{ccn}}$  aloft was lower than those in the atmosphere near the sea level. Varying wind speeds may change the convection, which in turn affected the  $N_{\text{ccn}}$  in the atmosphere near the sea level. For example, Clarke et al. (2013) reported that CCN activated in MBL clouds were strongly influenced by entrainment from the free troposphere (FT). Zheng et al. (2018) also argued that entrainment of FT aerosols was a vital source of accumulation mode particles over the eastern North Atlantic, which could activate as CCN easily.”

The last part has been revised as “Based on vertical backward air mass trajectories (Fig. S6), air masses were transported mostly from the Asian continent at high altitude (>2000 m a.m.s.l.) to the reception zones, indicating that air masses were affected by the entrainment of FT aerosols. Therefore, it is reasonable to argue that the  $N_{\text{ccn}}$  mixed downward from FT may be an important source of the  $N_{\text{ccn}}$  in the MBL over the NWPO. However, modeling studies are needed to quantify the contribution in the future.”

### **Technical issues:**

*Why do the authors use such complicated format when presenting concentrations ( $M \pm N \times 10^{-3}$ ). Would it be much simpler just to give the numbers as they are?*

**Response:** Considering analytic errors of FMPS and the effective number of number concentrations to be consistent with analytic errors, we used this format to present our results.

*Page 6, line 11: Following those in the literature, . . . ????*

**Response:** The part has been revised as “As proposed in previous studies, e.g., Dusek et al. (2006) and Kalivitis et al. (2015), the total number concentration ( $N_{>D_p}$ ) of particles larger than a threshold diameter ( $D_p$ ) can be used as a proxy for the  $N_{ccn}$ . Specifically, aerosol particles with the size exceeding 60~70 nm could be activated as CCN at SS of 0.4% (Dusek et al., 2018). In this study,  $N_{>D_p}$  with  $D_p$  varying from 50 nm to 80 nm was calculated and a linear correlation was conducted with the values of  $N_{ccn}$  measured at SS of 0.4%. A good correlation was obtained between  $N_{ccn}$  and  $N_{>60\text{ nm}}$ , with the slope of 0.98 closer to unity and  $R^2=0.94$  (Fig. 3).”

### **References**

- Clarke, A. D., Freitag, S., Simpson, R. M. C., Hudson, J. G., Howell, S. G., Brekhovskikh, V. L., Campos, T., Kapustin, V. N. and Zhou, J.: Free troposphere as a major source of CCN for the equatorial pacific boundary layer: Long-range transport and teleconnections, *Atmos. Chem. Phys.*, 13(15), 7511–7529, doi:10.5194/acp-13-7511-2013, 2013.
- Dadashazar, H., Braun, R. A., Crosbie, E. Chuang, P. Y., Woods, R. K., Jonsson, H. H., Sorooshian, A.: Aerosol characteristics in the entrainment interface layer in relation to the marine boundary layer and free troposphere, *Atmos. Chem. Phys.*, 18, 1495-1506, doi.org/10.5194/acp-18-1495-2018, 2018.
- Dusek, U., Frank, G. P., Hildebrandt, L., Curtius, J., Schneider, J., Walter, S., Chand, D., Drewnick, F., Hings, S., Jung, D., Borrmann, S. and Andreae, M. O.: Size matters more than chemistry aerosol particles, *Science*, 312(5778), 1375–1378, doi:10.1126/science.1125261, 2006.
- John, G. J., Stock, C. A., Dunne, J. P.: A more productive, but different, ocean after mitigation, *Geophys. Res. Lett.*, 42, 9836–9845, doi:10.1002/2015GL066160., 2015.
- Kalivitis, N., Kerminen, V., Kouvarakis, G., Stavroulas, I., Bougiatioti, A., Nenes, A., Manninen, H., Petäjä T., Kulmala, M., Mihalopoulos, N.: Atmospheric new particle formation as a source of CCN in the eastern Mediterranean marine boundary layer, *Atmos. Chem. Phys.*, 15, 9203-9215, doi:10.5194/acp-15-9203-2015, 2015.
- Koponen, I. K., Virkkula, a., Hillamo, R., Kerminen, V-T., Kulmala, M.: Number size distributions and concentrations of marine aerosols: Observations during a cruise between the English Channel and the coast of Antarctica, *J. Geophys. Res.*, 107, NO. D24, 4753, doi:10.1029/2002JD002533, 2002.
- Kristensen, T. B., Müller, T., Kandler, K., Benker, N., Hartmann, M., Prospero, J. M., Wiedensohler, A., Stratmann, F.: Properties of cloud condensation nuclei (CCN) in the trade wind marine boundary layer of the western North Atlantic, *Atmos. Chem. Phys.*, 16, 2675-2688, doi:10.5194/acp-16-2675-2016, 2016.

- Lauvset, S. K., Tjiputra, J., Muri, H.: Climate engineering and the ocean: effects on biogeochemistry and primary production, *Biogeosciences*, 14, 5675–5691, doi.org/10.5194/bg-14-5675-2017, 2017.
- Lee, B. P., Li, Y. J., Flagan, R. C., Lo, C., and Chan, C. K.: Sizing characterization of the fast mobility particle sizer (FMPS) against SMPS and HR-ToF-AMS, *Aerosol Sci. Technol.*, 47, 1030–1037, <https://doi.org/10.1080/02786826.2013.810809>, 2013.
- Lin, P., Hu, M., Wu, Z., Niu, Y., Zhu, T.: Marine aerosol size distributions in the springtime over China adjacent seas, *Atmos. Environ.*, 41, 6784–6796, 2007.
- Manktelow, P. T., Carslaw, K. S., Mann, G. W. and Spracklen, D. V.: The impact of dust on sulfate aerosol, CN and CCN during an East Asian dust storm, *Atmos. Chem. Phys.*, 10(2), 365–382, doi:10.5194/acp-10-365-2010, 2010.
- Mochida, M., Nishita-Hara, C., Furutani, H., Miyazaki, Y., Jung, J., Kawamura, K. and Uematsu, M.: Hygroscopicity and cloud condensation nucleus activity of marine aerosol particles over the western North Pacific, *J. Geophys. Res. Atmos.*, 116(6), 1–16, doi:10.1029/2010JD014759, 2011.
- Nair, V. S., Moorthy, K. K., Babu, S. S.: Influence of continental outflow and ocean biogeochemistry on the distribution of fine and ultrafine particles in the marine atmospheric boundary layer over Arabian Sea and Bay of Bengal, *J. Geophys. Res.-Atmos.*, 118, 7321–7331, doi:10.1002/jgrd.50541, 2013.
- Rose, C., Sellegri, K., Freney, E., Dupuy, R., Colomb, A., Pichon, J. M., Ribeiro, M., Bourianne, T., Burnet, F., Schwarzenboeck, A. Airborne measurements of new particle formation in the free troposphere above the Mediterranean Sea during the HYMEX campaign, *Atmos. Chem. Phys.*, 15, 10203–10218, doi:10.5194/acp-15-10203-2015, 2015.
- Rosenfeld, D., Zhu, Y., Wang, M., Zheng, Y., Goren, T., Yu, S.: Aerosol-driven droplet concentrations dominate coverage and water of oceanic low-level clouds. *Science* 363, eaav0566. DOI: 10.1126/science.aav0566, 2019.
- Sanchez, K. J., Chen, C., Russell, L. M., Betha, R., Liu, J., Price, D. J., Massoli, P., Ziemba, L. D. Crosbie, E. C., Moore, R. H., Müller, M., Schiller, S. A., Wisthaler, A., Lee, A. K. Y., Quinn, P. K., Bates, T. S., Porter, J., Bell, T. G., Saltzman, E. S., Vaillancourt, R. D., Behrenfeld, M. J.: Substantial Seasonal Contribution of Observed Biogenic Sulfate Particles to Cloud Condensation Nuclei, *Sci. Rep.*, 8, doi:10.1038/s41598-018-21590-9, 2018.
- Sato, Y., Suzuki, K.: How do aerosols affect cloudiness? *Science* 36 (6427), 580–581, doi: 10.1126/science.aaw3720, 2019.
- Takegawa, N., Moteki, N., Oshima, N., Koike, M., Kita, K., Shimizu, A. and Sugimoto, Y., Kondo, Y.: Variability of aerosol particle number concentrations observed over the western Pacific in the spring of 2009, *J. Geophys. Res. Atmos.*, 119, 13,474–13,488, doi:10.1002/2014JD022014, 2014.
- Ueda, S., Miura, K., Kawata, R., Furutani, H., Uematsu, M., Omori, Y. and Tanimoto, H.: Number–size distribution of aerosol particles and new particle formation events in tropical and subtropical Pacific Oceans, *Atmos. Environ.*, 142, 324–339, doi:10.1016/j.atmosenv.2016.07.055, 2016.

- Vu, T. V., Delgado-Saborit, J. M., Harrison, R. M.: Review: Particle number size distributions from seven major sources and implications for source apportionment studies, *Atmos. Environ.*, 122, 114-132, 2015.
- Zhu, Y., Li, K., Shen, Y., Gao, Y., Liu, X., Yu, Y., Gao, H., Yao, X.: New particle formation in the marine atmosphere during seven cruise campaigns, *Atmos. Chem. Phys.*, 19, 89-113, doi.org/10.5194/acp-19-89-2019, 2019.
- Zimmerman, N., Jeong, C. H., Wang, J. M., Ramos, M., Wallace, J. S. and Evans, G. J.: A source-independent empirical correction procedure for the fast mobility and engine exhaust particle sizers, *Atmos. Environ.*, 100, 178–184, doi:10.1016/j.atmosenv.2014.10.054, 2015.
